# Supplementary material for: Enhanced Transformation of Atrazine by High Efficient Visible Light-Driven N, S-Codoped TiO2Nanowires Photocatalysts
Source: Hindawi journal article supplement (doi:10.1155/2014/425836), 2014-01-01
Supplement: f1 [file 425836.f1.docx]

**Supplementary Data**

**Figure Captions**

Fig. S1 XRD of S-TiO2 NWs calcined at different temperature

Fig. S2 SEM images of S-TiO2 NWs

Fig. S3 HRTEM and SAED (inset) of S-TiO2 NWs calcined at 600 oC

Fig. S4 XPS of S-TiO2 NWs and NS-TiO2 NWs (a) S 2p; (b) N 1s; (c)Ti 2p;(d) O 1s

Fig. S5 BET of (a) NS-TiO2 NPs, (b) S-TiO2 NWs, and (c) NS-TiO2 NWs

Fig. S6 UV-vis spectrum of doped and undoped TiO2 NWs

Fig. S1

Fig. S2


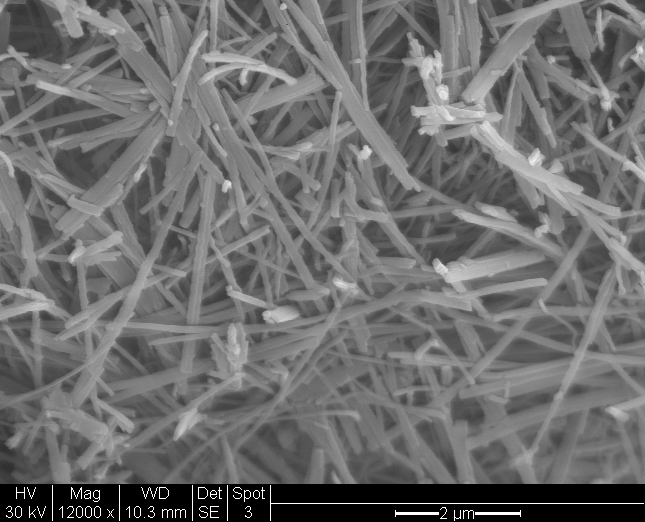


Fig. S3


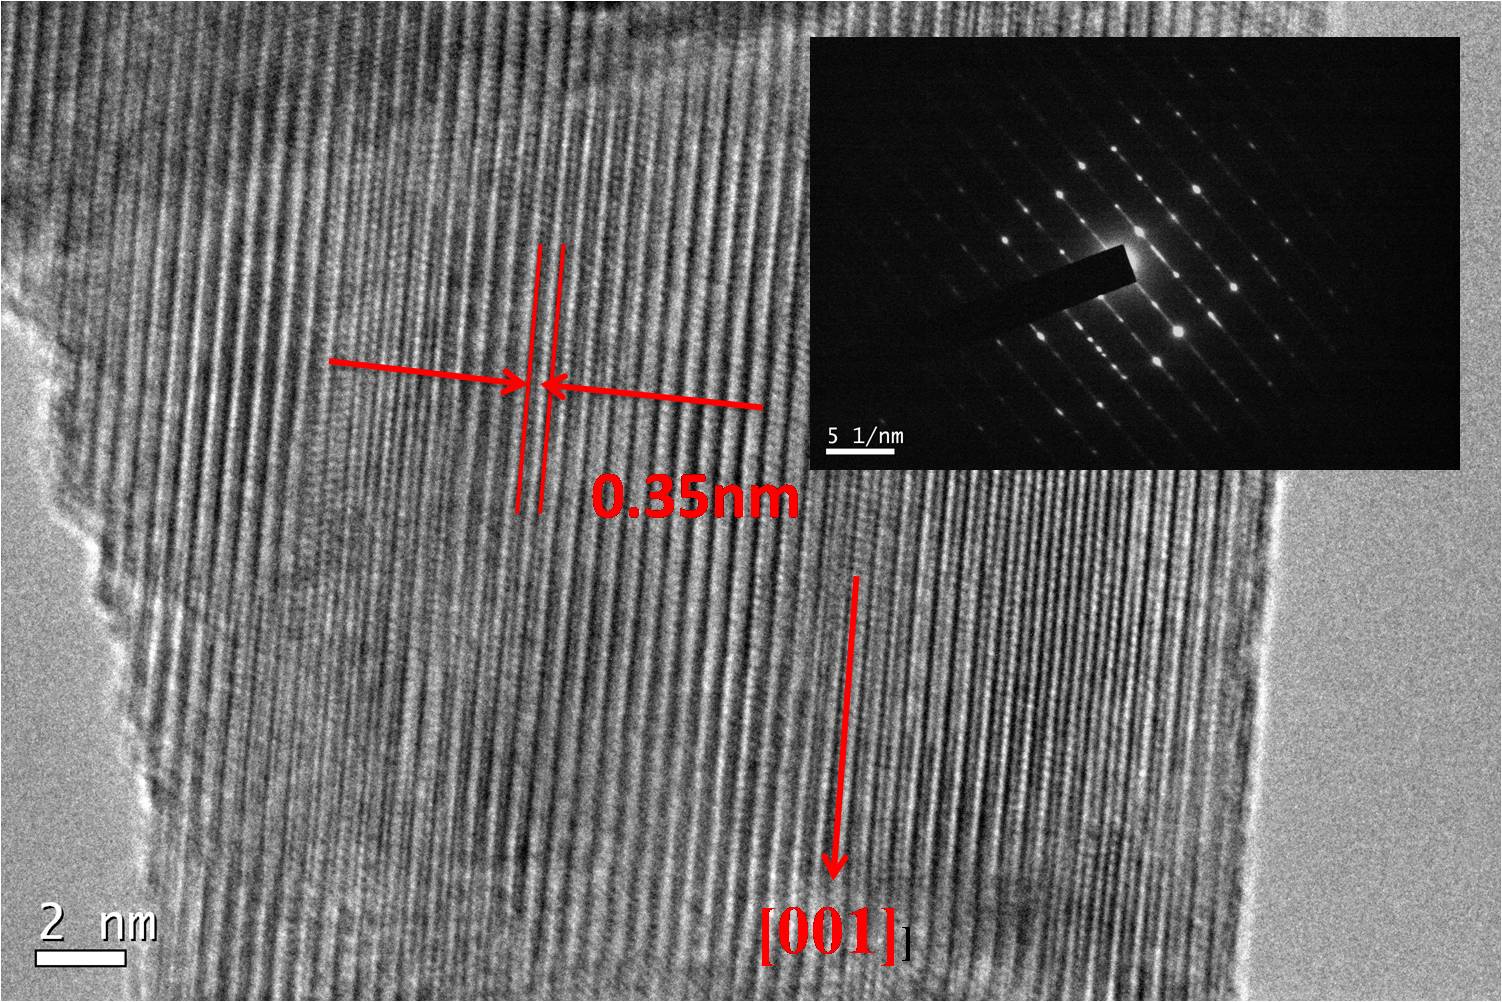


Fig. S4

(a)

(b)

(c)

(d)

Fig. S5

(a)

(b)

(c)

The surface area and porosity distribution of NS-TiO2 NPs, S-TiO2 NWs and NS-TiO2 NWs calcined at 500 oC were investigated using nitrogen adsorption and desorption isotherms. The isotherms of these three photocatalysts are typical type IV-like with a type H2 hysteretic loop, which indicates the presence of mesoporous materials. The plot of the pore size distribution (inset) was determined by using the Barrett-Joyner-Halenda (BJH) method from the desorption branch of the isotherm. It shows that these three photocatalysts clearly have mesoporous structure. The average pore diameter of NS-TiO2 NPs is about 25 nm and the BET surface area is 29.1 m2 g−1. The average pore diameter and the BET surface area of S-TiO2 NWs and NS-TiO2 NWs are about 35 nm, 22 nm and 39.8 m2 g−1, 35.1 m2 g−1, respectively.

Fig. S6

Fig. S6 exhibits the UV-vis absorption spectra of S-TiO2 NWs and NS-TiO2 NWs calcined at 600 oC compared to TiO2 NWs. A noticeable shift of the optical absorption edges of the doped TiO2 toward the visible region of the solar spectrum was observed whereas pure TiO2 NWs has no ability to respond to visible light. Obviously, this shift towards the longer wavelengths originates from the band gap narrowing of titanium dioxide by sulfur doping or nitrogen/sulfur codoping.
